# Supplementary material for: Multifunctional nanoparticle potentiates the in situ vaccination effect of radiation therapy and enhances response to immune checkpoint blockade
Source: PubMed Central journal article supplement (PMC9399096; doi:10.1038/s41467-022-32645-x), 2022-08-23
Supplement: 41467_2022_32645_MOESM1_ESM.pdf [file 41467_2022_32645_MOESM1_ESM.pdf]

## Supplementary Information

Multifunctional nanoparticle potentiates the in situ vaccination effect of radiation therapy and enhances response to immune checkpoint blockade

Ying Zhang<sup>1,2#</sup>, Raghava N. Sriramaneni<sup>3#</sup>, Paul A. Clark<sup>3</sup>, Justin C. Jagodinsky<sup>3</sup>, Mingzhou Ye<sup>1,2</sup>, Wonjong Jin<sup>3</sup>, Yuyuan Wang<sup>1,2</sup>, Amber Bates<sup>3</sup>, Caroline P. Kerr<sup>3,4</sup>, Trang Le<sup>5</sup>, Raad Allawi<sup>3</sup>, Xiuxiu Wang<sup>1,2</sup>, Ruosen Xie<sup>1,2</sup>, Thomas C. Havighurst<sup>5</sup>, Ishan Chakravarty<sup>3</sup>, Alexander L. Rakhmilevich<sup>3</sup>, Kathleen A. O'Leary<sup>6</sup>, Linda A. Schuler<sup>6</sup>, Paul M. Soudel<sup>3,7</sup>, Kyungmann Kim<sup>5</sup>, Shaoqin Gong<sup>1,2\*</sup>, Zachary S. Morris<sup>3\*</sup>

<sup>1</sup>Department of Biomedical Engineering and Wisconsin Institute for Discovery, University of Wisconsin-Madison, Madison, WI, USA

<sup>2</sup>Department of Ophthalmology and Visual Sciences, University of Wisconsin-Madison, Madison, WI, USA

<sup>3</sup>Department of Human Oncology, University of Wisconsin-Madison, Madison, WI, USA

<sup>4</sup>Department of Radiology, University of Wisconsin-Madison, Madison, WI, USA

<sup>5</sup>Department of Biostatistics and Medical Informatics, University of Wisconsin-Madison, Madison, WI, USA

<sup>6</sup>Department of Comparative Biosciences, University of Wisconsin-Madison, Madison, WI, USA

<sup>7</sup>Department of Pediatrics, University of Wisconsin-Madison, Madison, WI, USA

# These authors contribute equally.

\*Corresponding authors: shaoqingong@wisc.edu; zmorris@humonc.wisc.edu

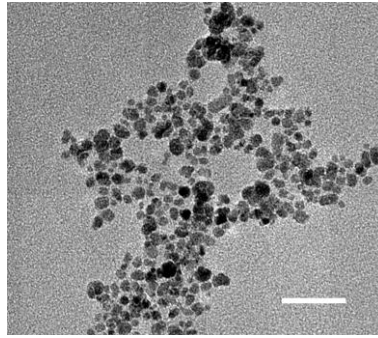

**Supplementary Figure 1.** A TEM image of the ION. Scale bar: 50 nm. A representative image from three independent samples is shown.

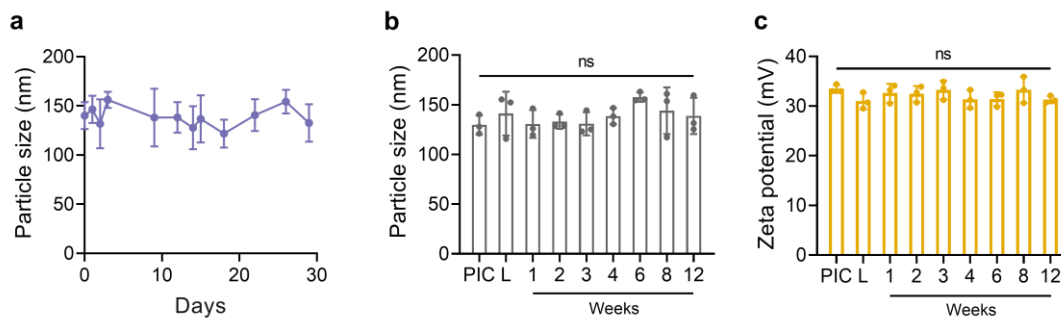

**Supplementary Figure 2.** (a) The particle size of PIC in the presence of 1mM PBS during storage at 4°C. (b) particle size and (c) zeta potential of lyophilized PIC in the presence of 1% sucrose during storage for 12 weeks at -20°C. (n=3 independent samples). L: PIC after lyophilization. Data are shown as mean ± SD. Statistical significance was calculated via one-way ANOVA test in b-c. \*p<0.05, \*\*p<0.01, \*\*\*p<0.001 and \*\*\*\*p<0.0001. Source data are provided in Source Data file.

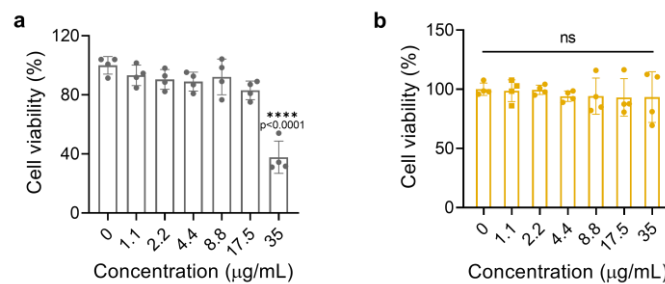

**Supplementary Figure 3.** The cell viability of (a) B78 cells and (b) RAW264.7 cells after in vitro co-culture with indicated concentrations of PIC for 48 h. (n=4 biologically independent samples). Data are shown as mean ± SD. Statistical significance was calculated via one-way ANOVA test. \*p<0.05, \*\*p<0.01, \*\*\*p<0.001 and \*\*\*\*p<0.0001. Source data are provided in Source Data file.

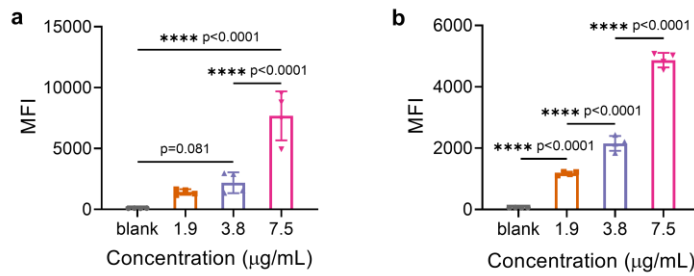

**Supplementary Figure 4.** The mean fluorescence intensity (MFI) of FITC in (a) B78 cells and (b) RAW264.7 cells after in vitro treatment with indicated concentrations of FITC-labeled PIC for 2 h. (n=4 biologically independent samples). Data are shown as mean  $\pm$  SD. Statistical significance was calculated via one-way ANOVA test. \*p<0.05, \*\*p<0.01, \*\*\*p<0.001 and \*\*\*\*p<0.0001. Source data are provided in Source Data file.

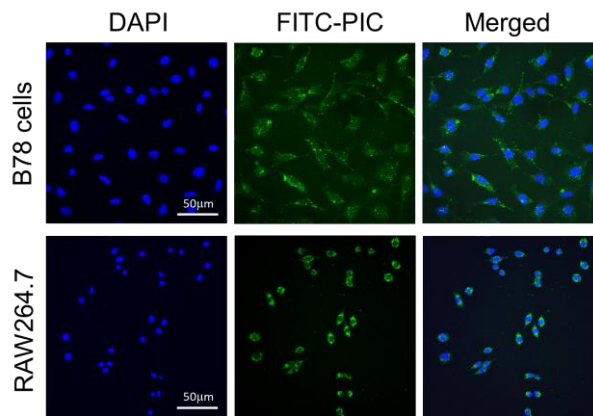

**Supplementary Figure 5.** Confocal laser scanning microscopy (CLSM) images of B78 cells and RAW264.7 cells after treatment with FITC-labeled PIC for 2h. A representative image of three independent samples from each group is shown.

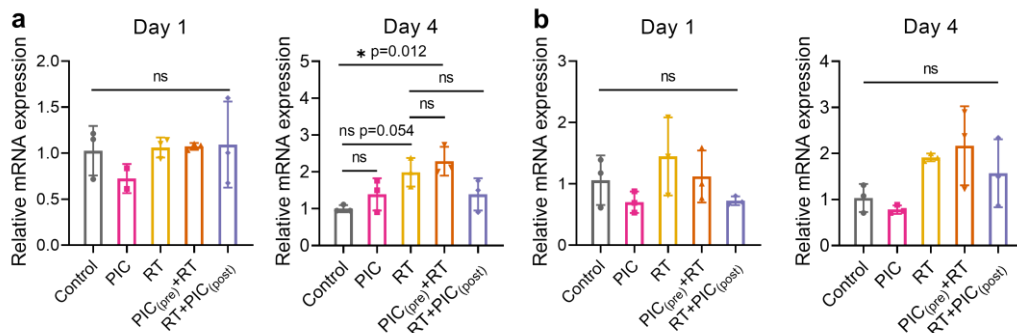

**Supplementary Figure 6.** The mRNA expression of (a) *Ifnβ1* and (b) *Pd-1* in B78 cells at day 1 and day 4

after indicated in vitro treatments. (n=3 biologically independent samples). PIC: 4.67 µg/mL; RT: 12 Gy. The treatments of the cells were given per **Figure 2a**. Data are shown as mean ± SD. Statistical significance was calculated via one-way ANOVA test. \*p<0.05, \*\*p<0.01, \*\*\*p<0.001 and \*\*\*\*p<0.0001. Source data are provided in Source Data file.

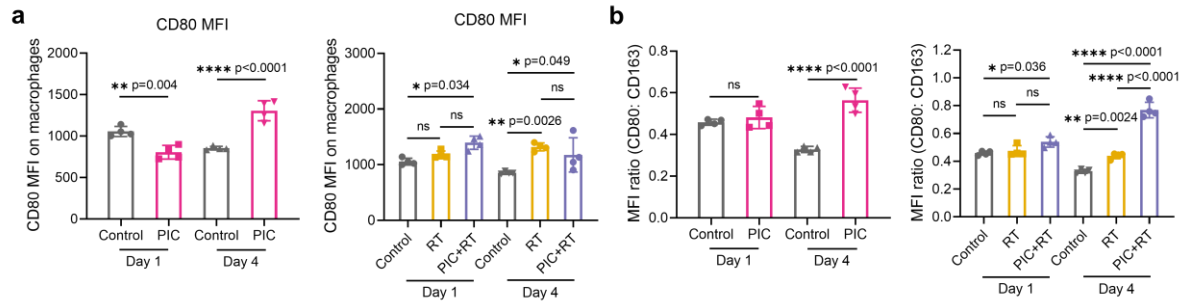

**Supplementary Figure 7.** The (a) mean fluorescence intensity (MFI) of CD80 and (b) ratios of CD80 MFI to CD163 MFI on CD11b<sup>+</sup>F4/80<sup>+</sup> BMDMs at day 1 and day 4 after indicated treatments. RT: 12 Gy. PIC: 4.67 µg/mL. The treatments of the cells were given per **Figure 2d**. (n=4 biologically independent samples). Data are shown as mean ± SD. Statistical significance was calculated via one-way ANOVA test. \*p<0.05, \*\*p<0.01, \*\*\*p<0.001 and \*\*\*\*p<0.0001. Source data are provided in Source Data file.

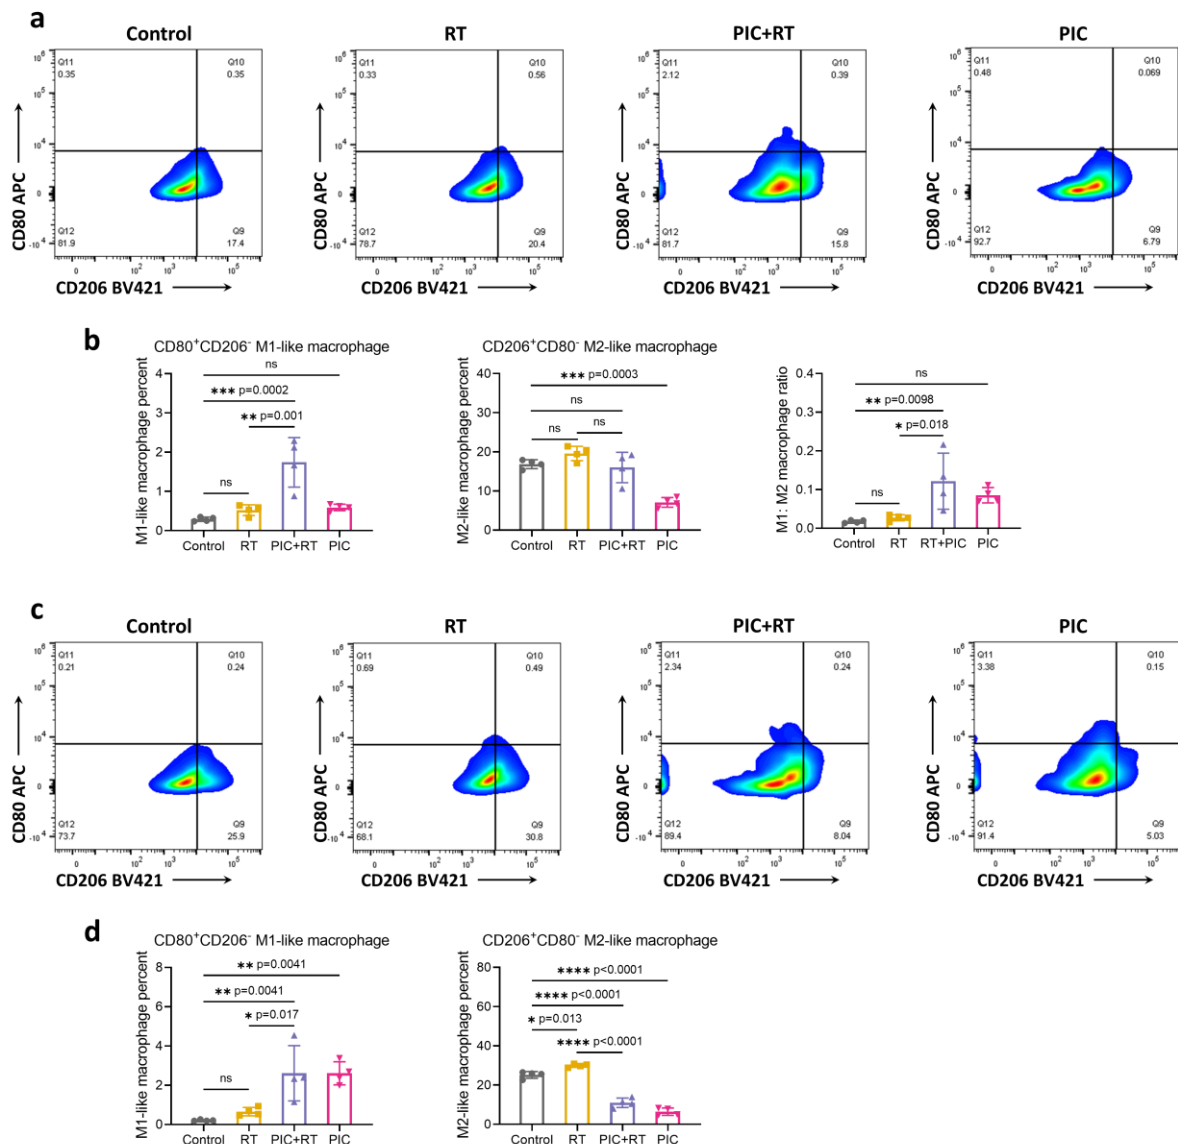

**Supplementary Figure 8.** (a) Representative flow cytometry data and (b) quantification of M1-like macrophages (CD80<sup>+</sup>CD206<sup>-</sup>) and M2-like macrophages (CD206<sup>+</sup>CD80<sup>-</sup>) among CD11b<sup>+</sup>F4/80<sup>+</sup> BMDMs and their ratios at day 1 after indicated treatments. (c) Representative flow cytometry data and (d) quantification of the M1-like macrophages (CD80<sup>+</sup>CD206<sup>-</sup>) and M2 macrophages (CD206<sup>+</sup>CD80<sup>-</sup>) among CD11b<sup>+</sup>F4/80<sup>+</sup> BMDMs at day 4 after indicated treatments. (n=4 biologically independent samples). PIC: 4.67  $\mu$ g/mL; RT: 12 Gy. The treatments of the cells were given per **Figure 2d**. Statistical significance was calculated via one-way ANOVA test in **b** and **d**, and data are shown as mean  $\pm$  SD. \*p<0.05, \*\*p<0.01, \*\*\*p<0.001 and \*\*\*\*p<0.0001. Source data are provided in Source Data file.

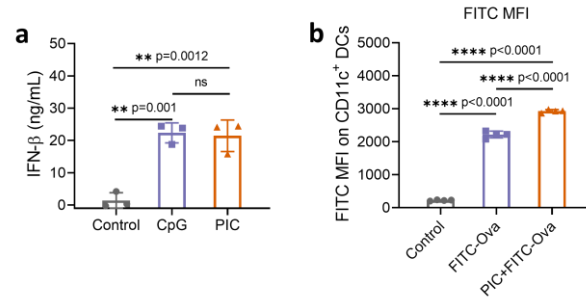

**Supplementary Figure 9.** (a) The concentration of IFN- $\beta$  secreted from CD11c<sup>+</sup> dendritic cells after indicated treatment for 24 hours. CpG: 0.5  $\mu$ g/mL; PIC: 4.67  $\mu$ g/mL. (n=3 biologically independent samples). (b) The mean fluorescence intensity (MFI) of FITC-Ova in CD11c<sup>+</sup> DCs at 24 h after treatment. FITC-Ova: 1.67  $\mu$ g/mL; PIC: 4.67  $\mu$ g/mL. (n=4 biologically independent samples). Data are shown as mean  $\pm$  SD. Statistical significance was calculated via one-way ANOVA test. \*p<0.05, \*\*p<0.01, \*\*\*p<0.001 and \*\*\*\*p<0.0001. Source data are provided in Source Data file.

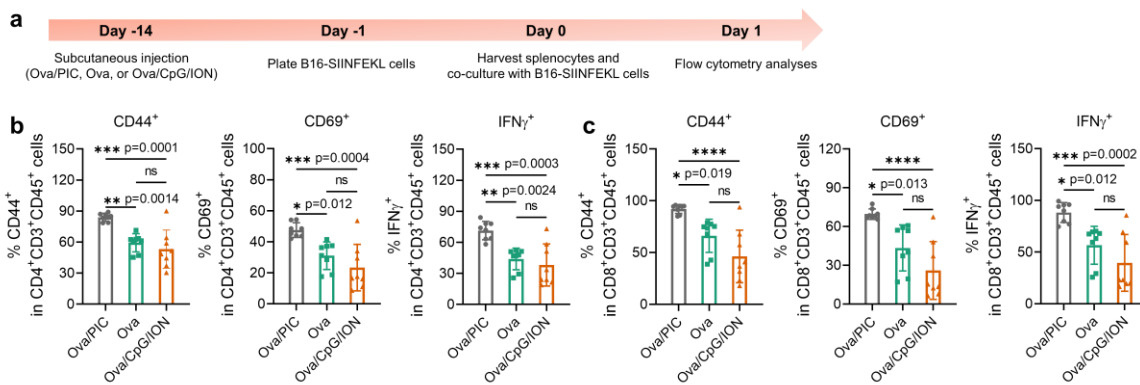

**Supplementary Figure 10.** (a) Scheme for the co-culture of B16-SIINFEKL cells with splenocytes extracted from Ova, Ova/PIC, or Ova/CpG/ION injected mice. Quantification of CD44<sup>+</sup>, CD69<sup>+</sup> and IFN $\gamma$ <sup>+</sup> cells out of (b) CD4<sup>+</sup>CD3<sup>+</sup>CD45<sup>+</sup> and (c) CD8<sup>+</sup>CD3<sup>+</sup>CD45<sup>+</sup> cells in splenocytes by flow cytometry. (n=8 biologically independent samples). Data are shown as mean  $\pm$  SD. Statistical significance was calculated via one-way ANOVA test. \*p<0.05, \*\*p<0.01, \*\*\*p<0.001 and \*\*\*\*p<0.0001. Gating strategy is shown in Supplementary Figure 11. Source data are provided in Source Data file.

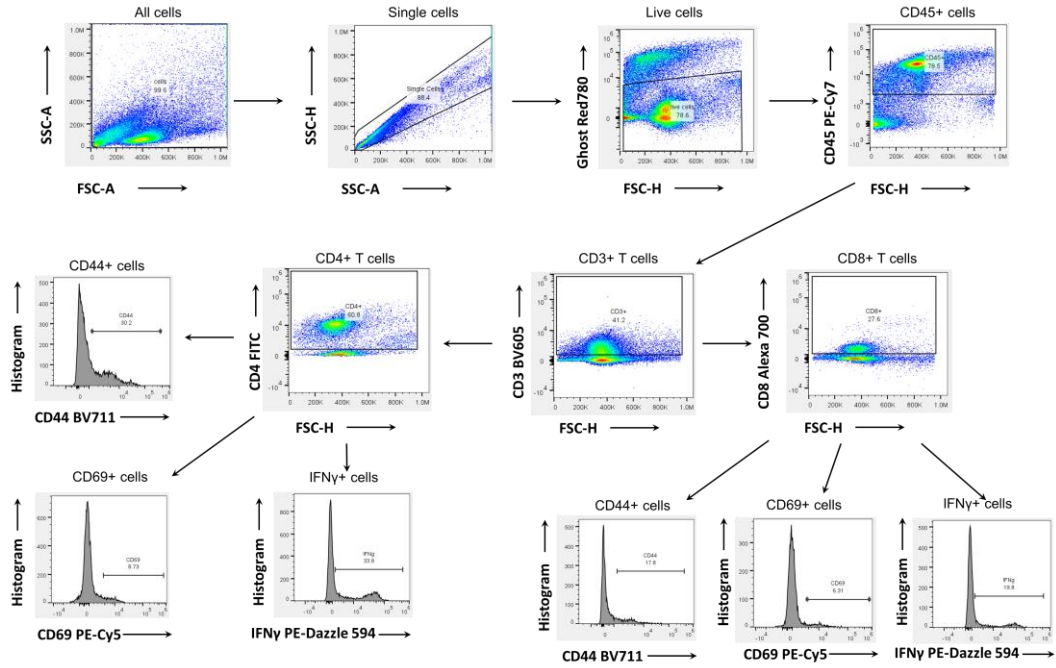

**Supplementary Figure 11.** Gating strategy of the T cell analysis as shown in Supplementary Figure 10.

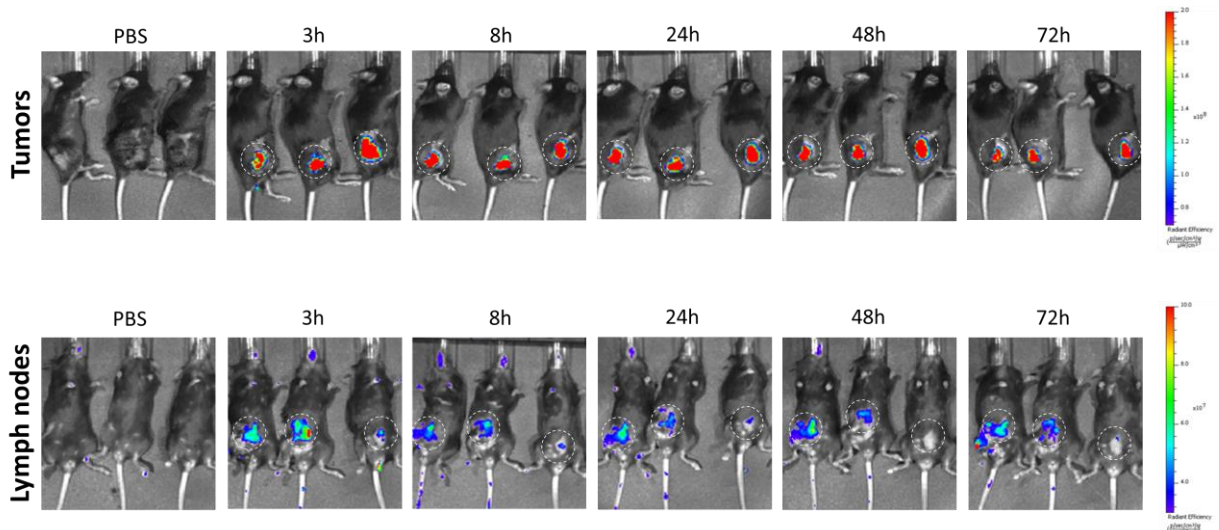

**Supplementary Figure 12.** IVIS images of B78 melanoma-bearing mice at indicated timepoints after Cy5-labeled PIC (Cy5-PIC) was intratumorally injected.

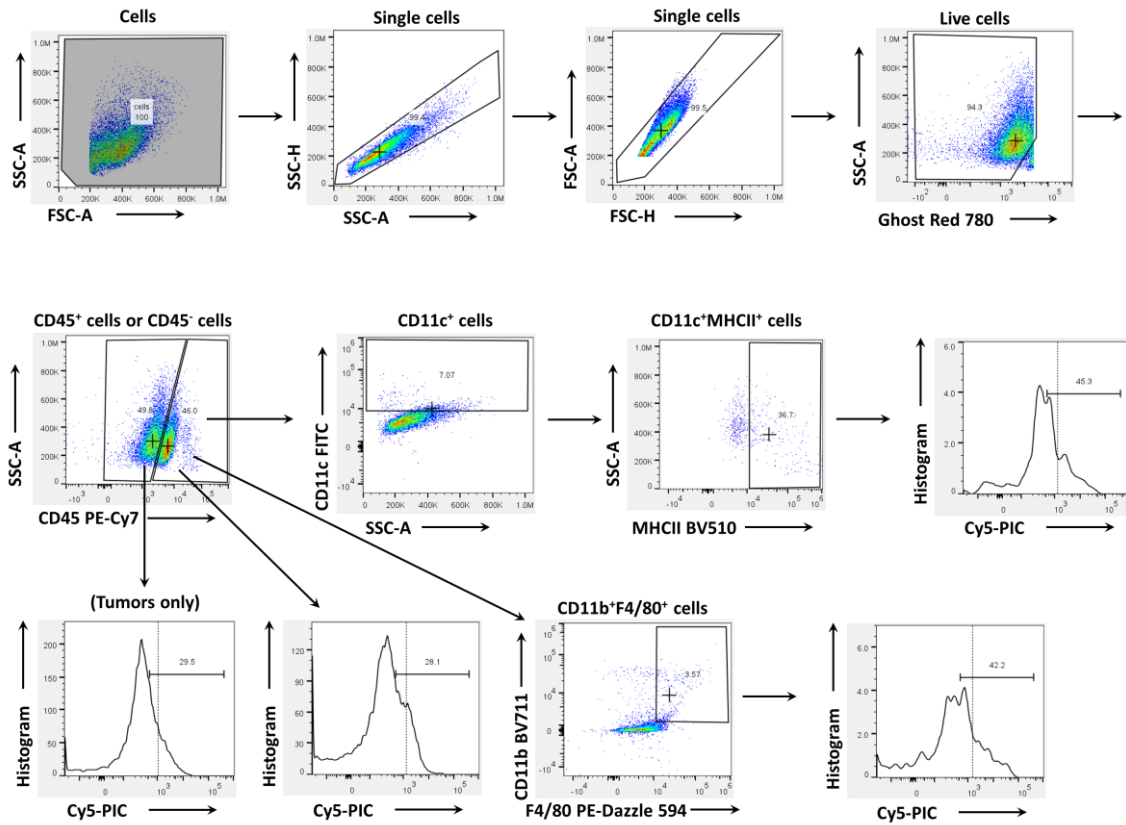

**Supplementary Figure 13.** Gating strategy for the analysis of Cy5-PIC internalization in antigen presenting cells in the tumor microenvironment and tumor-draining lymph nodes (TDLNs) after it was intratumorally injected into B78 melanoma-bearing mice.



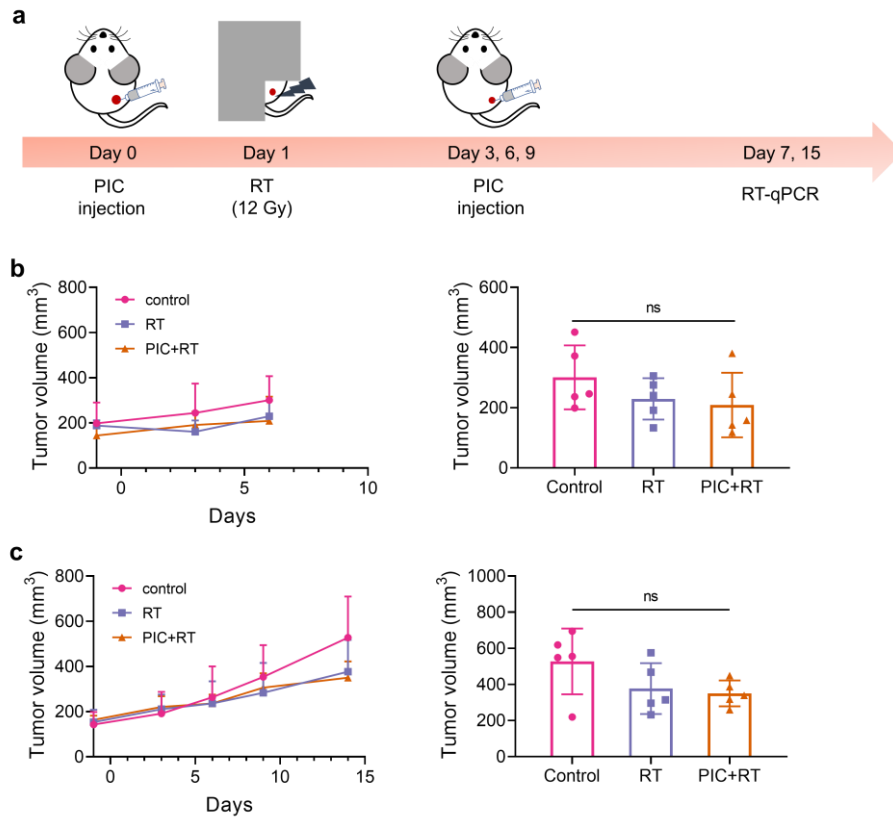

**Supplementary Figure 14.** (a) Scheme for the treatment. The tumor growth curves and average tumor volumes of B78 melanoma bearing mice at (b) day 6 and (c) day 14 after indicated treatments. The mice were euthanized at (b) day 7 and (c) day 15 for qPCR analysis of bulk tumor samples. (n=5 biologically independent animals). PIC: 140 $\mu$ g/100 $\mu$ L/dose. RT: 12 Gy. Data are shown as mean  $\pm$  SD. Statistical significance was calculated via one-way ANOVA test in b and c. \*p<0.05, \*\*p<0.01, \*\*\*p<0.001 and \*\*\*\*p<0.0001. Source data are provided in Source Data file.

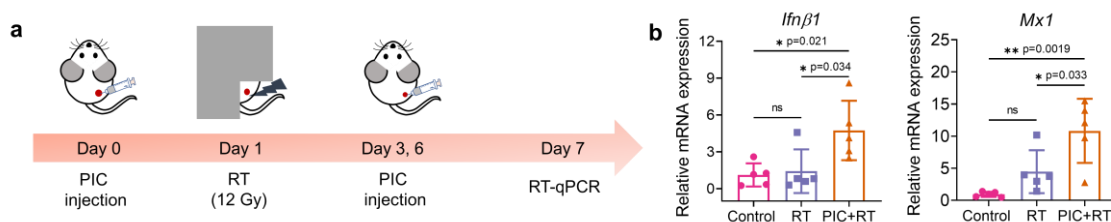

**Supplementary Figure 15.** (a) Scheme for the study of the immunomodulatory effect of PIC+RT on the tumor microenvironment. (b) The mRNA expression of *Ifn $\beta$ 1* and *Mx1* in the B78 tumor microenvironment at day 7 after the indicated treatment. (n=5 biologically independent samples). PIC: 140 $\mu$ g/100 $\mu$ L/dose. RT: 12 Gy. Statistical significance was calculated via one-way ANOVA test in b and data are shown as mean  $\pm$  SD. \*p<0.05, \*\*p<0.01, \*\*\*p<0.001 and \*\*\*\*p<0.0001. Source data are provided in Source Data file.

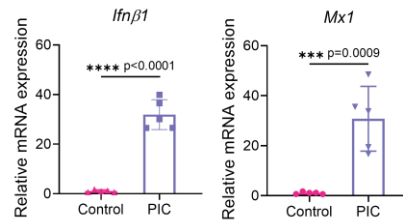

**Supplementary Figure 16.** The mRNA expression of *Ifnβ1* and *Mx1* in the B78 tumors at day 15 after PIC or control treatment. PIC: 140μg/100μL/dose. PIC was intratumorally injected at day 0, 3, 6 and 9. (n=5 biologically independent samples). Data are shown as mean ± SD. Statistical significance was calculated via unpaired t-test. \*p<0.05, \*\*p<0.01, \*\*\*p<0.001 and \*\*\*\*p<0.0001. Source data are provided in Source Data file.

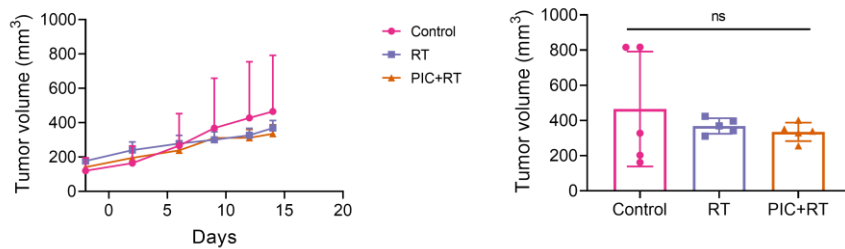

**Supplementary Figure 17.** The growth of B78 melanoma tumors in syngeneic mice (left) and average tumor volumes at day 14 (right) after indicated treatments. The mice were euthanized at day 15 for flow cytometry analyses of tumors and TDLNs. PIC: 140μg/100μL/dose; RT: 12 Gy. (n=5 biologically independent animals). The indicated treatments were given per **Figure 4a**. Data are shown as mean ± SD. Statistical significance was calculated via one-way ANOVA test. \*p<0.05, \*\*p<0.01, \*\*\*p<0.001 and \*\*\*\*p<0.0001. Source data are provided in Source Data file.

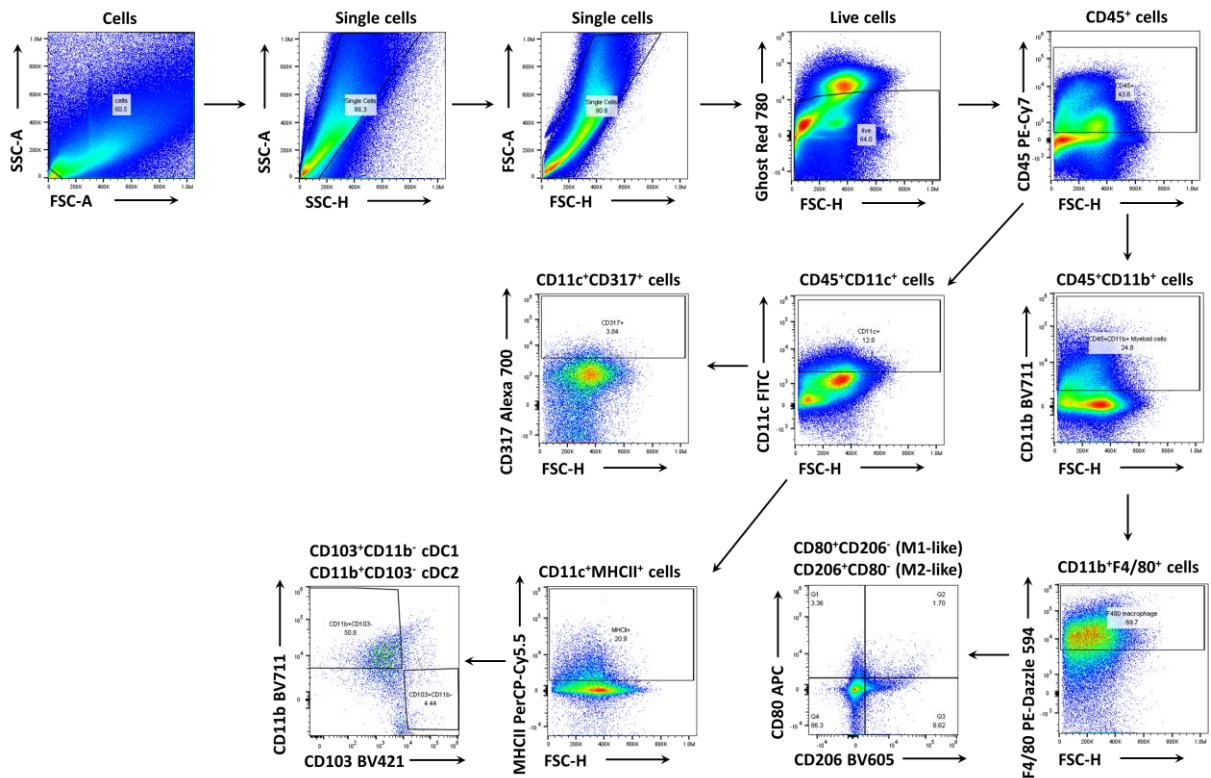

Supplementary Figure 18. Gating strategy for the analysis of innate immune cells in B78 tumors.

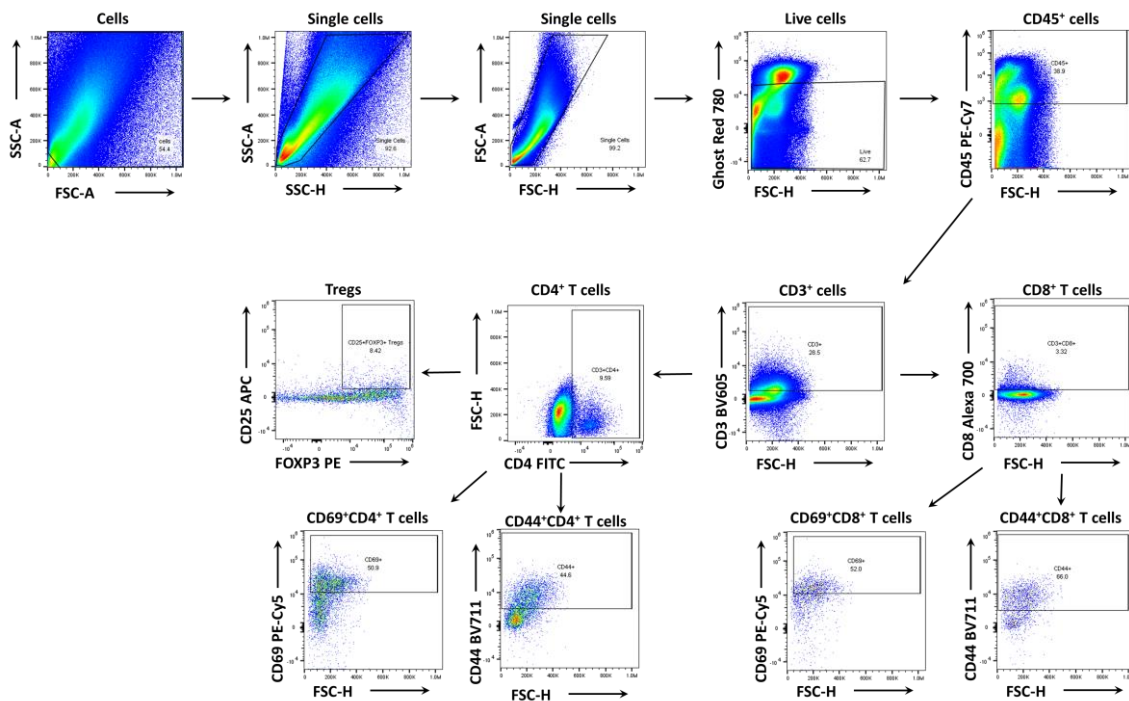

Supplementary Figure 19. Gating strategy for the analysis of adaptive immune cells in B78 tumors.

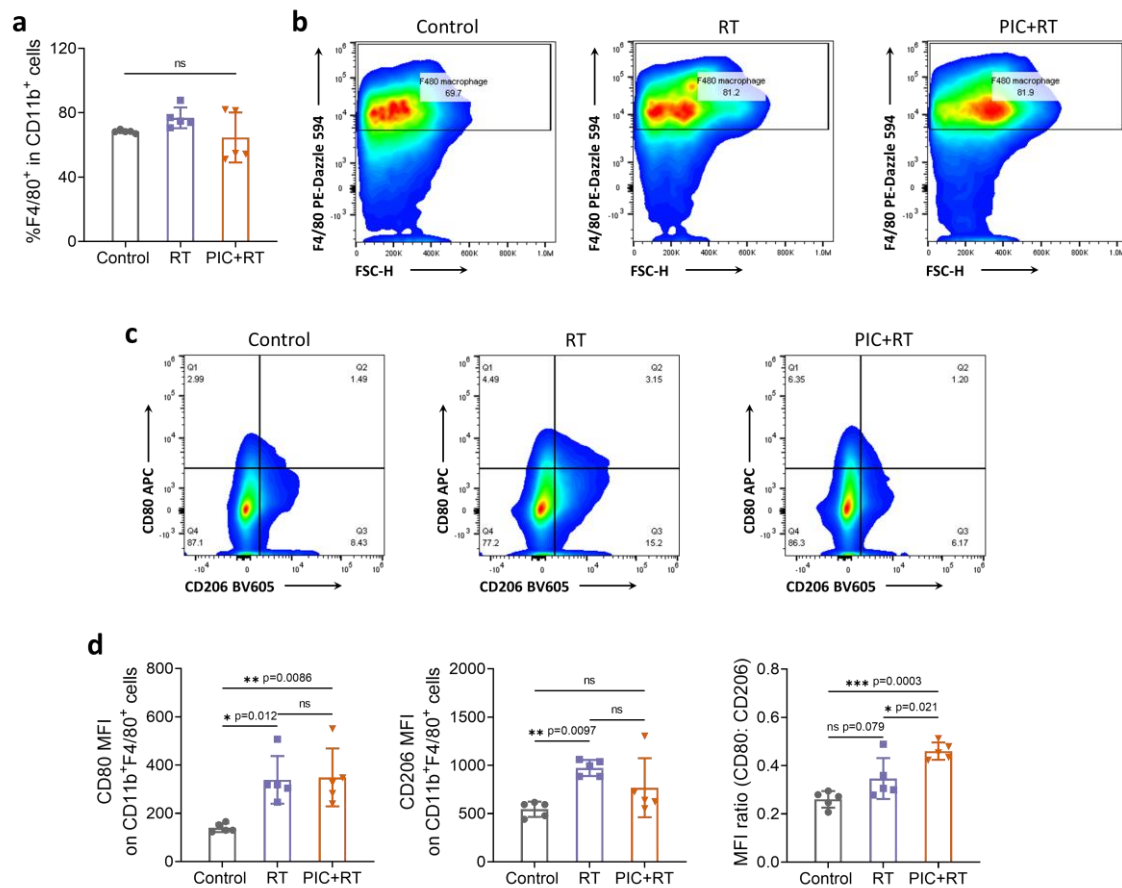

**Supplementary Figure 20.** (a) Quantification and (b) representative flow cytometry data identifying F4/80<sup>+</sup> cells in CD11b<sup>+</sup>CD45<sup>+</sup> myeloid cells in B78 tumors after indicated treatments. (c) Representative flow cytometry data identifying CD80<sup>+</sup>CD206<sup>-</sup> cells (M1-like macrophages) and CD206<sup>+</sup>CD80<sup>-</sup> cells (M2-like macrophages) in CD11b<sup>+</sup>F4/80<sup>+</sup> macrophages in B78 tumors after indicated treatments. (d) The mean fluorescence intensity (MFI) of CD80 and CD206, and their ratios relative to total CD11b<sup>+</sup>F4/80<sup>+</sup> macrophages in B78 tumors after indicated treatments. PIC: 140μg/100μL/dose; RT: 12 Gy. (n=5 biologically independent samples). The indicated treatments were given per **Figure 4a** and the tumor samples were collected at day 15 after initiation of indicated treatments. Statistical significance was calculated via one-way ANOVA test in **a** and **d**, and data are shown as mean ± SD. \*p<0.05, \*\*p<0.01, \*\*\*p<0.001 and \*\*\*\*p<0.0001. Source data are provided in Source Data file.

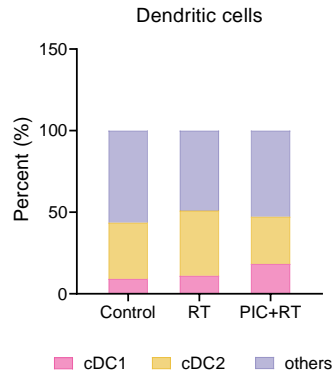

**Supplementary Figure 21.** The percentage of CD103<sup>+</sup>CD11b<sup>-</sup> cDC1s and CD11b<sup>+</sup>CD103<sup>-</sup> cDC2s among CD11c<sup>+</sup>MHCII<sup>+</sup> DCs in TDLN from mice bearing B78 flank tumors, after indicated treatments. PIC: 140μg/100μL/dose; RT: 12 Gy. The indicated treatments were given per **Figure 4a** and the tumor samples were collected at day 15 after initiation of indicated treatments. Source data are provided in Source Data file.

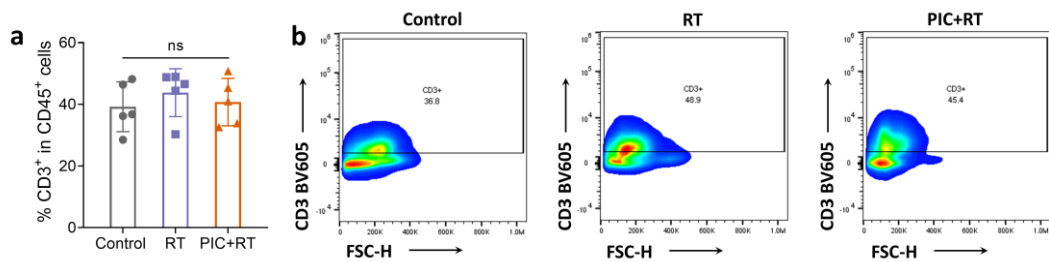

**Supplementary Figure 22.** (a) Quantification and (b) representative flow cytometry data identifying CD3<sup>+</sup> cells among CD45<sup>+</sup> cells in B78 tumors after indicated treatments. PIC: 140μg/100μL/dose; RT: 12 Gy. (n=5 biologically independent samples). The indicated treatments were given per **Figure 4a** and the tumor samples were collected at day 15 after initiation of indicated treatments. Statistical significance was calculated via one-way ANOVA test in a, and data are shown as mean ± SD. \*p<0.05, \*\*p<0.01, \*\*\*p<0.001 and \*\*\*\*p<0.0001. Source data are provided in Source Data file.

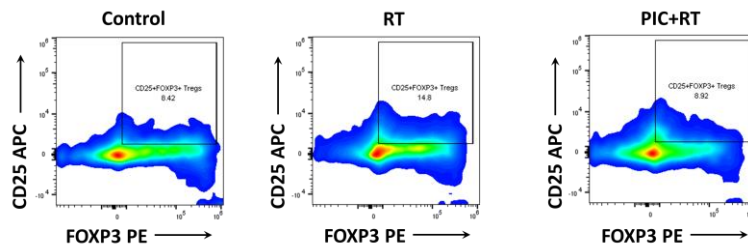

**Supplementary Figure 23.** Representative flow cytometry data quantifying CD25<sup>+</sup>FOXP3<sup>+</sup> Tregs among CD4<sup>+</sup>CD3<sup>+</sup>CD45<sup>+</sup> cells in B78 tumors after indicated treatments. PIC: 140μg/100μL/dose; RT: 12 Gy. The indicated treatments were given per **Figure 4a** and the tumor samples were collected at day 15 after

initiation of indicated treatments.

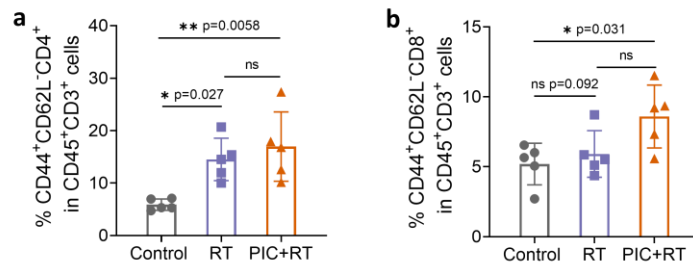

**Supplementary Figure 24.** The percentage of (a) CD44<sup>+</sup>CD62L<sup>-</sup>CD4<sup>+</sup> and (b) CD44<sup>+</sup>CD62L<sup>-</sup>CD8<sup>+</sup> effector memory cells out of CD45<sup>+</sup>CD3<sup>+</sup> cells in B78 tumors after indicated treatment. PIC: 140μg/100μL/dose; RT: 12 Gy. (n=5 biologically independent samples). The indicated treatments were given per **Figure 4a** and the tumor samples were collected at day 15 after initiation of indicated treatments. Data are shown as mean ± SD. Statistical significance was calculated via one-way ANOVA test. \*p<0.05, \*\*p<0.01, \*\*\*p<0.001 and \*\*\*\*p<0.0001. Source data are provided in Source Data file.

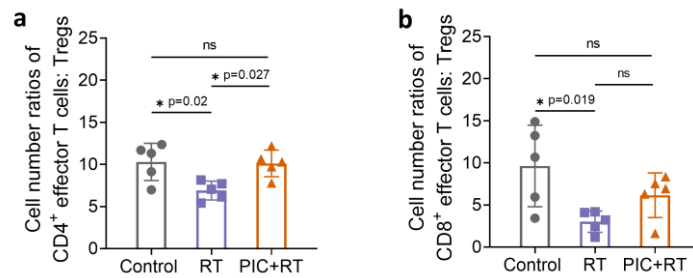

**Supplementary Figure 25.** The cell number ratios of (a) CD4<sup>+</sup> effector T cells: Tregs and (b) CD8<sup>+</sup> effector T cells: Tregs in B78 tumors after indicated treatments. CD4<sup>+</sup> effector T cells: CD44<sup>+</sup>CD4<sup>+</sup>CD3<sup>+</sup>CD45<sup>+</sup>; CD8<sup>+</sup> effector T cells: CD44<sup>+</sup>CD8<sup>+</sup>CD3<sup>+</sup>CD45<sup>+</sup>; Tregs: CD25<sup>+</sup>FOXP3<sup>+</sup>CD4<sup>+</sup>CD3<sup>+</sup>CD45<sup>+</sup>. PIC: 140μg/100μL/dose; RT: 12 Gy. (n=5 biologically independent samples). The indicated treatments were given per **Figure 4a** and the tumor samples were collected at day 15 after initiation of indicated treatments. Data are shown as mean ± SD. Statistical significance was calculated via one-way ANOVA test. \*p<0.05, \*\*p<0.01, \*\*\*p<0.001 and \*\*\*\*p<0.0001. Source data are provided in Source Data file.

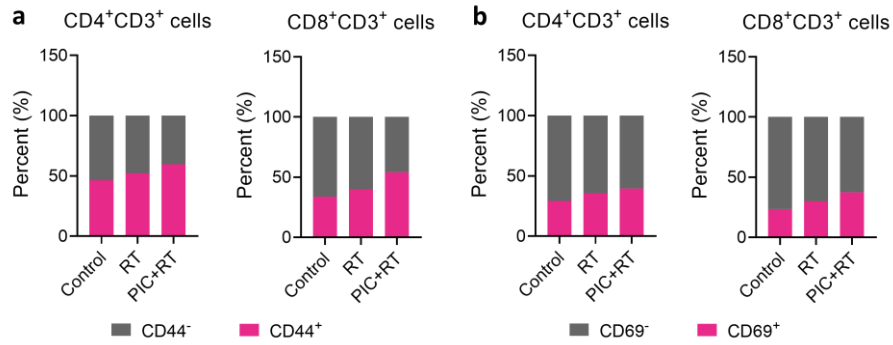

**Supplementary Figure 26.** The percentage of (a) CD44<sup>+</sup> and (b) CD69<sup>+</sup> cells out of CD3<sup>+</sup>CD4<sup>+</sup> T cells (left) and CD3<sup>+</sup>CD8<sup>+</sup> T cells (right) in TDLNs after indicated treatments. PIC: 140μg/100μL/dose; RT: 12 Gy. (n=5 biologically independent samples). The indicated treatments were given per **Figure 4a** and the TDLNs were collected at day 15 after initiation of indicated treatments. Source data are provided in Source Data file.

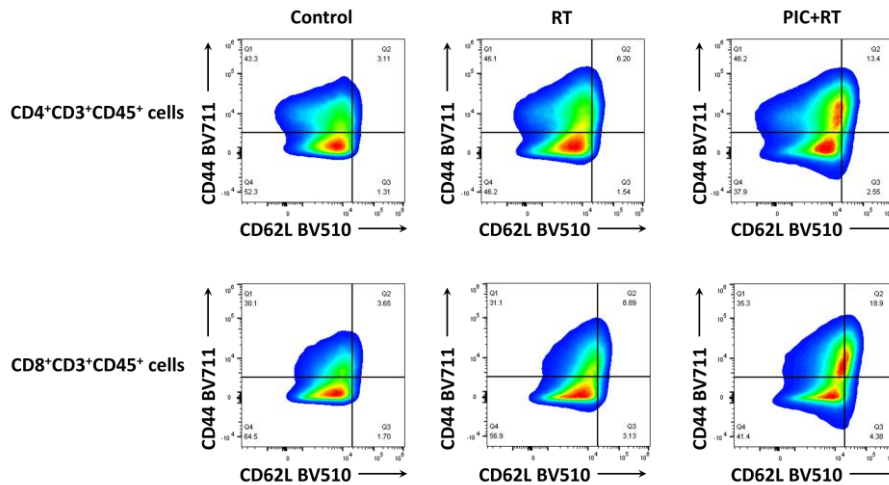

**Supplementary Figure 27.** Representative flow cytometry data of central memory T cells (CD44<sup>+</sup>CD62L<sup>+</sup>) and effector memory T cells (CD44<sup>+</sup>CD62L<sup>-</sup>) in CD4<sup>+</sup>CD3<sup>+</sup>CD45<sup>+</sup> or CD8<sup>+</sup>CD3<sup>+</sup>CD45<sup>+</sup> cells in TDLNs after indicated treatments. PIC: 140μg/100μL/dose; RT: 12 Gy. The indicated treatments were given per **Figure 4a** and the TDLNs were collected at day 15 after initiation of indicated treatments.

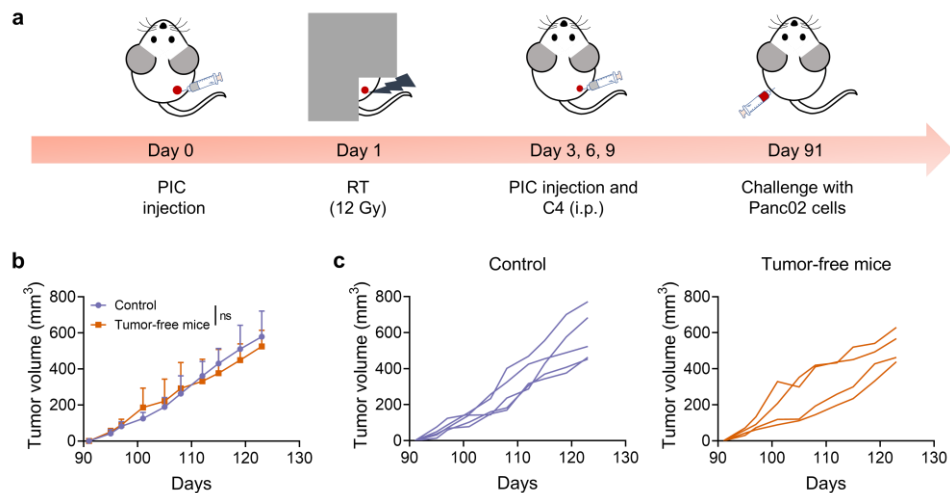

**Supplementary Figure 28.** (a) Scheme for the treatment of mice bearing a B78 melanoma and subsequent implantation with an unrelated Panc02 tumor. (b) Average Panc02 tumor growth curves are shown after these tumors were engrafted in naïve control mice or in mice rendered disease-free from a B78 melanoma by PIC+RT+anti-CTLA-4. (control: n=5; tumor-free mice: n=4 biologically independent animals). (c) Individual mouse tumor growth curves from (b). Data are shown as mean  $\pm$  SD. Statistical significance was calculated via linear mixed effects modeling in b. \* $p < 0.05$ , \*\* $p < 0.01$ , \*\*\* $p < 0.001$  and \*\*\*\* $p < 0.0001$ . Source data are provided in Source Data file.

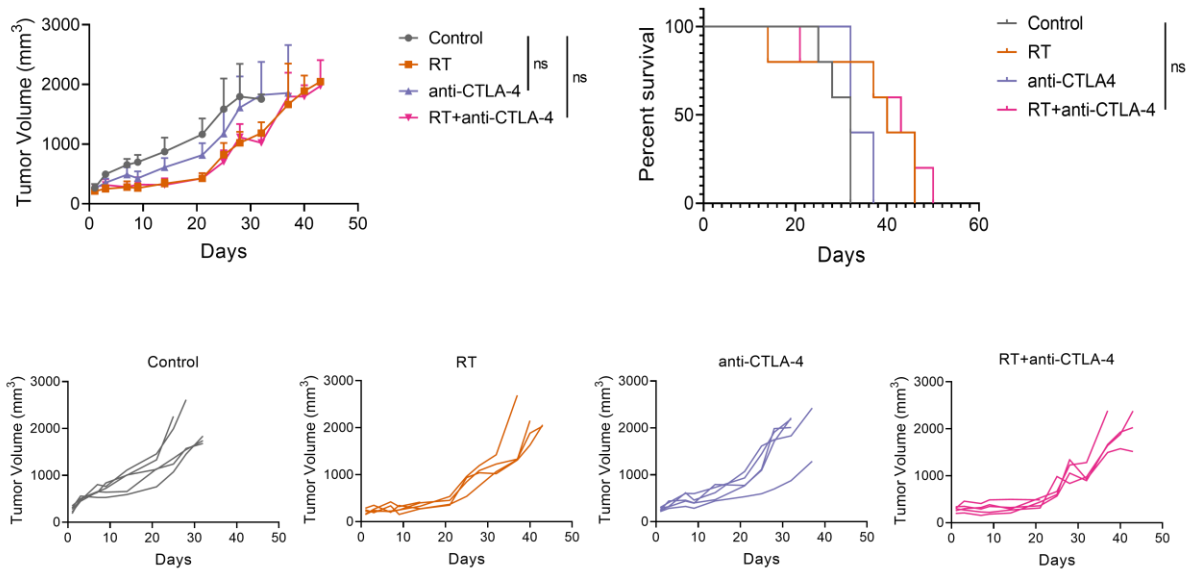

**Supplementary Figure 29.** TC11 tumor growth and mice survival after indicated treatments. RT: 12 Gy. Anti-CTLA-4: 100  $\mu\text{g}/100\mu\text{L}/\text{dose}$ . (n=5 biologically independent animals). The indicated treatments were given per Figure 6a. Data are shown as mean  $\pm$  SD. Statistical significance was calculated via linear mixed effects modeling and log-rank test for tumor growth and mice survival, respectively. \* $p < 0.05$ , \*\* $p < 0.01$ , \*\*\* $p < 0.001$  and \*\*\*\* $p < 0.0001$ . Source data are provided in Source Data file.



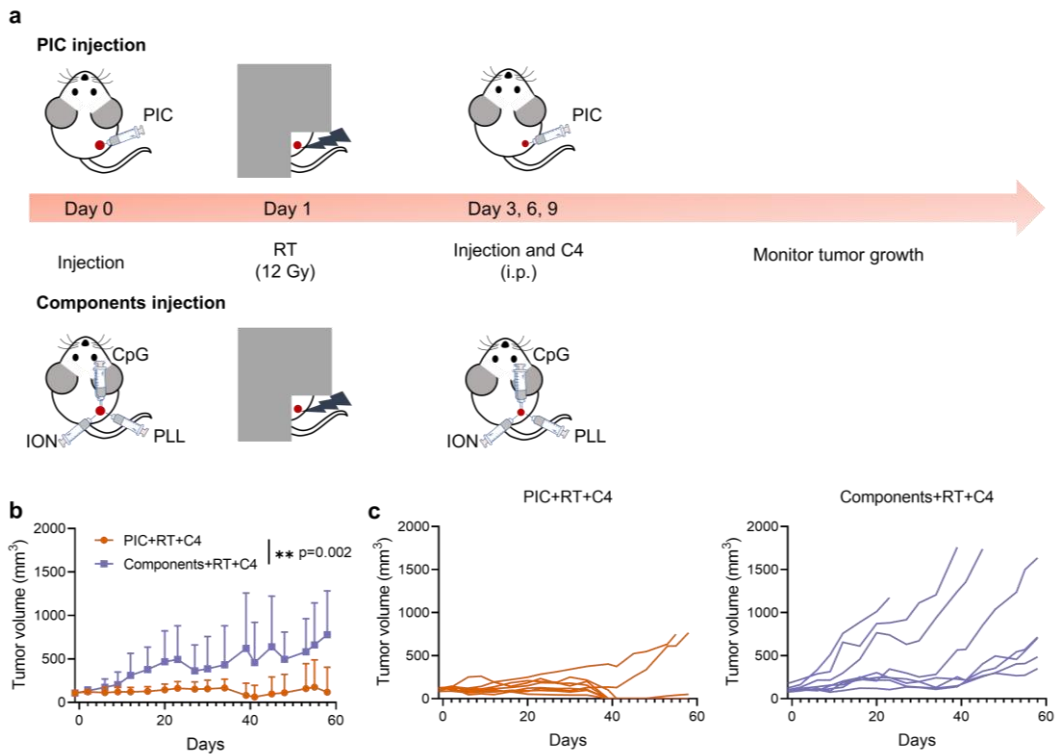

**Supplementary Figure 30.** (a) Scheme for the treatment of mice bearing a B78 melanoma flank tumor. (b) Average tumor growth curves of mice are displayed following the indicated treatment regimen. (n=8 biologically independent animals). (c) Individual tumor growth curves for mice in (b). RT: 12 Gy. PIC: 140  $\mu\text{g}/100\mu\text{L}/\text{dose}$ . C4 (anti-CTLA-4): 100  $\mu\text{g}/100\mu\text{L}/\text{dose}$ . Statistical significance was calculated via linear mixed effects modeling in **b**, and data are shown as mean  $\pm$  SD. \* $p<0.05$ , \*\* $p<0.01$ , \*\*\* $p<0.001$  and \*\*\*\* $p<0.0001$ . Source data are provided in Source Data file.

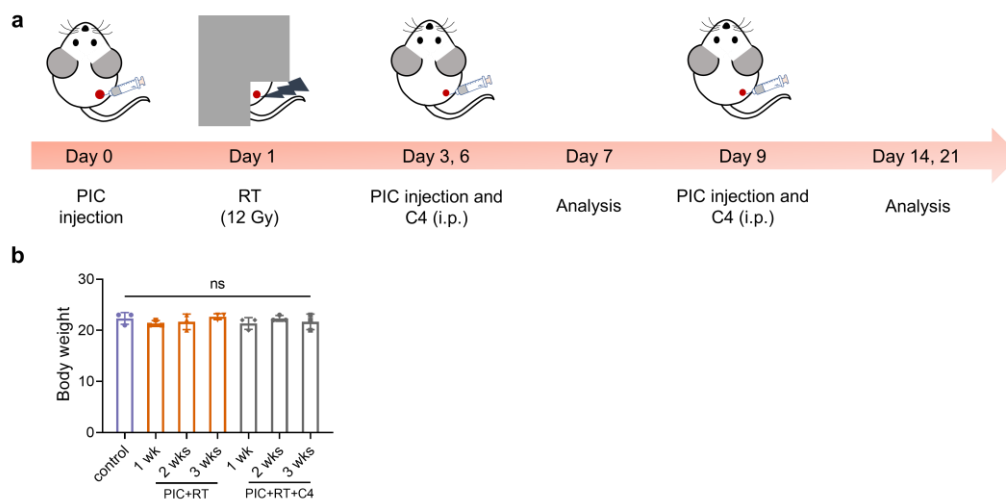

**Supplementary Figure 31.** (a) Scheme for delivery of treatment for in vivo toxicity studies. (b) No significant

change was observed in the body weight of mice bearing a B78 melanoma after treatment with PIC + RT or PIC+RT+C4. PIC: 140µg/100µL/dose. RT: 12 Gy. C4 (anti-CTLA-4): 100µg/100µL/dose. (n=3 biologically independent animals). Data are shown as mean ± SD. Statistical significance was calculated via one-way ANOVA test. \*p<0.05, \*\*p<0.01, \*\*\*p<0.001 and \*\*\*\*p<0.0001. Source data are provided in Source Data file.

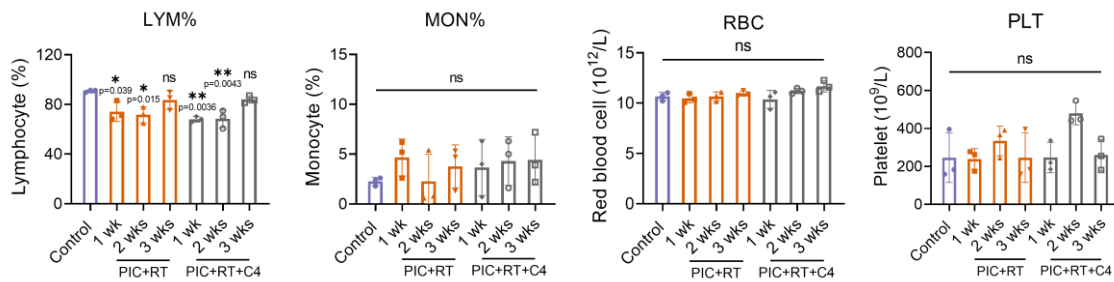

**Supplementary Figure 32.** The complete blood counts of B78 melanoma bearing mice after indicated treatments. PIC: 140µg/100µL/dose. RT: 12 Gy. C4 (anti-CTLA-4): 100µg/100µL/dose. (n=3 biologically independent samples). The indicated treatments were given per Supplementary Figure 31a. Data are shown as mean ± SD. Statistical significance was calculated via one-way ANOVA test. \*p<0.05, \*\*p<0.01, \*\*\*p<0.001 and \*\*\*\*p<0.0001. Source data are provided in Source Data file.

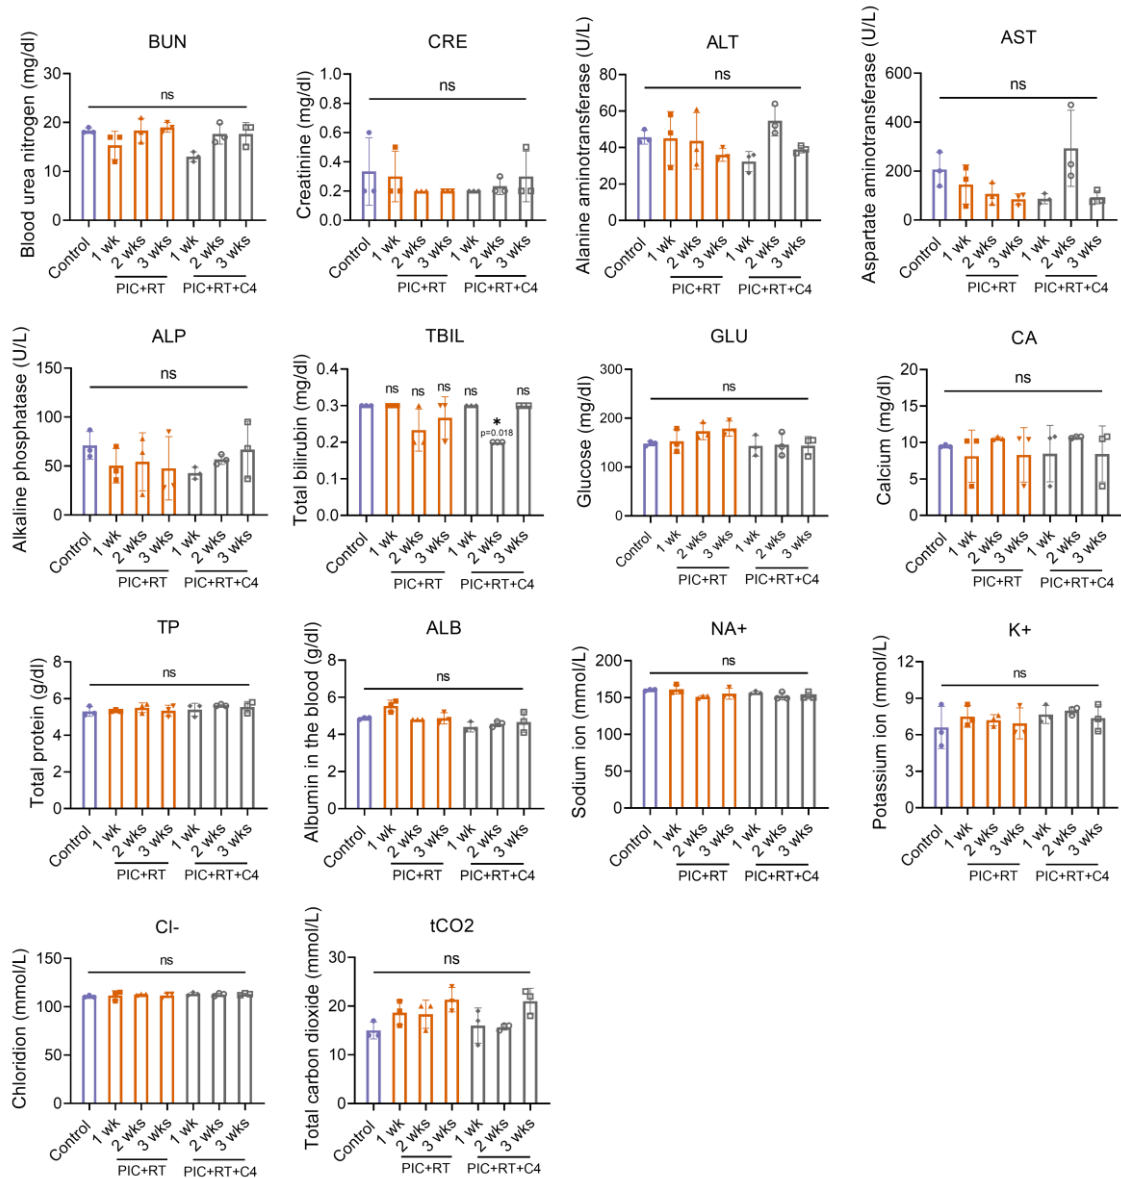

**Supplementary Figure 33.** The blood metabolic profiles of mice bearing a B78 melanoma after indicated treatments. PIC: 140 $\mu$ g/100 $\mu$ L/dose. RT: 12 Gy. C4 (anti-CTLA-4): 100 $\mu$ g/100 $\mu$ L/dose. (n=3 biologically independent samples). The indicated treatments were given per Supplementary Figure 31a. Data are shown as mean  $\pm$  SD. Statistical significance was calculated via one-way ANOVA test. \*p<0.05, \*\*p<0.01, \*\*\*p<0.001 and \*\*\*\*p<0.0001. Source data are provided in Source Data file.

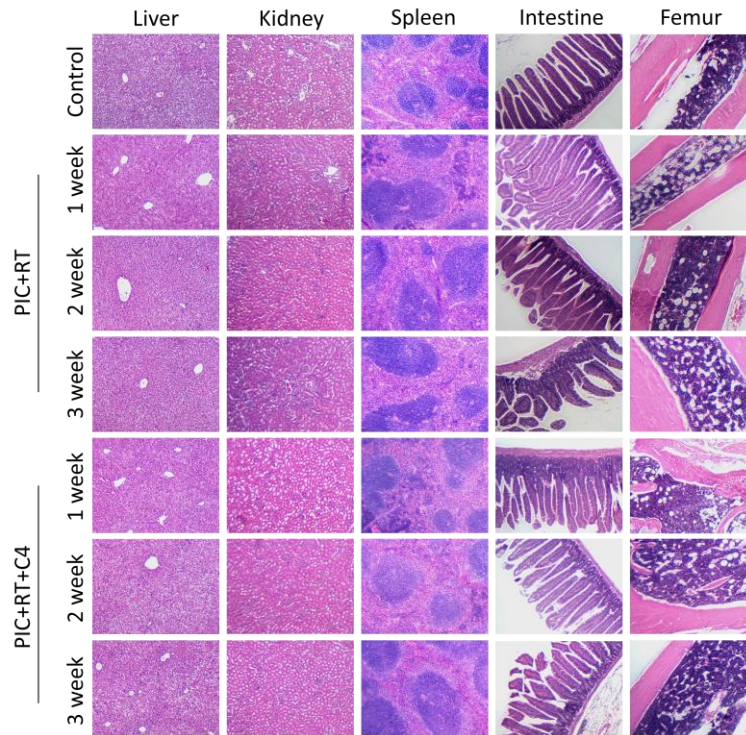

**Supplementary Figure 34.** Images of H&E stained sections of major organs (liver, spleen, kidney, intestine and femur) from mice bearing a B78 melanoma and treated with PIC+RT or PIC+RT+C4. PIC: 140 $\mu$ g/100 $\mu$ L/dose. RT: 12 Gy. C4 (anti-CTLA-4): 100 $\mu$ g/100 $\mu$ L/dose. The indicated treatments were given per Supplementary Figure 31a. A representative image of three independent samples from each group is shown.

**Supplementary Table 1.** Particle size and zeta potential of ION/PLL/CpG nanoparticle with different weight ratio.

(w/w/w indicates the weight ratio between different components)

| ION/PLL/CpG (w/w/w) | Particle Size (nm)   | Zeta potential (mV) |
|---------------------|----------------------|---------------------|
| 9.6/2/3             | 141.5nm (PDI: 0.231) | -30.5, -30.5, -29.8 |
| 9.6/4/3             | precipitation        |                     |
| 9.6/7/3             | 121.8nm (PDI: 0.127) | 24.6, 23.3, 24.4    |
| 4.8/3.5/1           | 113.2nm (PDI: 0.302) | 32.8, 34, 34.3      |

**Supplementary Table 2.** The cell number data for flow cytometry analyses of innate immune cells from B78 tumors. (The figures are shown in Figure 4b-4h and Supplementary Figure 20)

| Sample labels | Live cells | Myeloid cells | Macrophages | M1 macrophages | M2 macrophages | pDCs  | CD80 <sup>+</sup> pDCs | cDC1 | cDC2  |
|---------------|------------|---------------|-------------|----------------|----------------|-------|------------------------|------|-------|
| Control-1     | 711242     | 92795         | 63274       | 1895           | 5332           | 1265  | 178                    | 529  | 3650  |
| Control-2     | 654187     | 82500         | 56437       | 989            | 3295           | 745   | 79                     | 509  | 4903  |
| Control-3     | 630078     | 68331         | 47612       | 1598           | 4105           | 1350  | 211                    | 327  | 3735  |
| Control-4     | 665761     | 77567         | 51967       | 1652           | 2775           | 960   | 97                     | 447  | 4948  |
| Control-5     | 771599     | 68742         | 46944       | 845            | 3609           | 509   | 42                     | 279  | 2427  |
| RT-1          | 594992     | 137753        | 106056      | 4765           | 16117          | 6716  | 901                    | 1222 | 7189  |
| RT-2          | 359319     | 61320         | 49818       | 2734           | 8908           | 5242  | 869                    | 541  | 8413  |
| RT-3          | 532121     | 86181         | 75594       | 5522           | 10854          | 5084  | 637                    | 726  | 4725  |
| RT-4          | 494551     | 64257         | 45407       | 2878           | 8900           | 7826  | 1458                   | 412  | 4941  |
| RT-5          | 450643     | 87702         | 65644       | 2786           | 8995           | 5043  | 833                    | 516  | 11326 |
| PIC+RT-1      | 427793     | 78873         | 43160       | 2608           | 3172           | 2254  | 413                    | 328  | 2003  |
| PIC+RT-2      | 608191     | 129232        | 105789      | 7566           | 20887          | 14215 | 2769                   | 1991 | 4825  |
| PIC+RT-3      | 435215     | 87134         | 56004       | 3558           | 3456           | 2545  | 438                    | 413  | 2448  |
| PIC+RT-4      | 728356     | 153189        | 78271       | 5455           | 7856           | 4303  | 535                    | 1980 | 5098  |
| PIC+RT-5      | 705359     | 140193        | 76108       | 4166           | 5605           | 4045  | 845                    | 555  | 2925  |

Myeloid cells: CD45<sup>+</sup>CD11b<sup>+</sup>; Macrophages: CD45<sup>+</sup>CD11b<sup>+</sup>F4/80<sup>+</sup>;

M1 macrophages: CD45<sup>+</sup>CD11b<sup>+</sup>F4/80<sup>+</sup>CD80<sup>+</sup>CD206<sup>+</sup>; M2 macrophages: CD45<sup>+</sup>CD11b<sup>+</sup>F4/80<sup>+</sup>CD206<sup>+</sup>CD80<sup>-</sup>;

pDCs: CD45<sup>+</sup>CD11c<sup>+</sup>CD317<sup>+</sup>; cDC1: CD45<sup>+</sup>CD11c<sup>+</sup>MHCII<sup>+</sup>CD103<sup>+</sup>CD11b<sup>-</sup>;

cDC2: CD45<sup>+</sup>CD11c<sup>+</sup>MHCII<sup>+</sup>CD11b<sup>+</sup>CD103<sup>-</sup>

**Supplementary Table 3.** The cell number data for flow cytometry analyses of adaptive immune cells from B78 tumors. (The figures are shown in Figure 4i-4o and Supplementary Figure 22-25)

| Sample labels | Live cells | T cells | CD4 <sup>+</sup> T cells | CD8 <sup>+</sup> T cells | Tregs | Effector CD4 <sup>+</sup> T cells | Effector CD8 <sup>+</sup> T cells | Activated CD4 <sup>+</sup> T cells | Activated CD8 <sup>+</sup> T cells |
|---------------|------------|---------|--------------------------|--------------------------|-------|-----------------------------------|-----------------------------------|------------------------------------|------------------------------------|
| Control-1     | 575638     | 64391   | 6167                     | 2136                     | 520   | 4750                              | 1778                              | 3142                               | 1111                               |
| Control-2     | 496732     | 84314   | 7074                     | 5441                     | 864   | 6026                              | 5131                              | 3582                               | 3228                               |
| Control-3     | 490462     | 113835  | 6700                     | 7709                     | 504   | 6221                              | 7495                              | 3924                               | 3825                               |
| Control-4     | 525719     | 130090  | 6935                     | 7651                     | 560   | 6335                              | 7409                              | 3576                               | 3461                               |
| Control-5     | 575461     | 87590   | 5411                     | 4662                     | 418   | 4885                              | 4461                              | 3564                               | 2751                               |
| RT-1          | 455784     | 70180   | 19881                    | 3905                     | 2753  | 14873                             | 3171                              | 12686                              | 2360                               |
| RT-2          | 334984     | 93720   | 12715                    | 5745                     | 1640  | 11561                             | 5265                              | 9145                               | 3661                               |
| RT-3          | 460347     | 128827  | 14716                    | 8037                     | 1632  | 13287                             | 6686                              | 10795                              | 5256                               |
| RT-4          | 439941     | 128199  | 21171                    | 8738                     | 3143  | 19276                             | 7658                              | 16424                              | 6361                               |
| RT-5          | 380795     | 138363  | 22326                    | 13160                    | 2901  | 21477                             | 12128                             | 14899                              | 6328                               |
| PIC+RT-1      | 354867     | 75672   | 14231                    | 8798                     | 1270  | 13065                             | 7159                              | 9175                               | 5583                               |
| PIC+RT-2      | 523847     | 82994   | 28682                    | 6409                     | 3109  | 24211                             | 5037                              | 22558                              | 4889                               |
| PIC+RT-3      | 387528     | 140353  | 15591                    | 11301                    | 1374  | 14613                             | 10366                             | 10058                              | 5763                               |
| PIC+RT-4      | 570609     | 183122  | 60942                    | 35054                    | 2962  | 36019                             | 18655                             | 23758                              | 11084                              |
| PIC+RT-5      | 597722     | 109240  | 16718                    | 13769                    | 1521  | 14783                             | 12715                             | 10094                              | 7539                               |

T cells: CD45<sup>+</sup>CD3<sup>+</sup>; CD4<sup>+</sup> T cells: CD45<sup>+</sup>CD3<sup>+</sup>CD4<sup>+</sup>; CD8<sup>+</sup> T cells: CD45<sup>+</sup>CD3<sup>+</sup>CD8<sup>+</sup>; Tregs: CD45<sup>+</sup>CD3<sup>+</sup>CD4<sup>+</sup>CD25<sup>+</sup>FOXP3<sup>+</sup>;

Effector CD4<sup>+</sup> T cells: CD45<sup>+</sup>CD3<sup>+</sup>CD4<sup>+</sup>CD44<sup>+</sup>; Effector CD8<sup>+</sup> T cells: CD45<sup>+</sup>CD3<sup>+</sup>CD8<sup>+</sup>CD44<sup>+</sup>;

Activated CD4<sup>+</sup> T cells: CD45<sup>+</sup>CD3<sup>+</sup>CD4<sup>+</sup>CD69<sup>+</sup>; Activated CD8<sup>+</sup> T cells: CD45<sup>+</sup>CD3<sup>+</sup>CD8<sup>+</sup>CD69<sup>+</sup>

**Supplementary Table 4.** The reference of Taqman genes used for RT-qPCR studies.

| Taqman gene                                                        | Assay ID      |
|--------------------------------------------------------------------|---------------|
| <i>Ifnb1</i> (interferon beta)                                     | Mm00439552_s1 |
| <i>Mx1</i> (MX dynamin-like GTPase 1)                              | Mm00487796_m1 |
| <i>Arg1</i> (Arginase)                                             | Mm00475988_m1 |
| <i>Nos2</i> (Nitric oxide synthase 2)                              | Mm00440502_m1 |
| <i>Ifn<math>\gamma</math></i> (interferon gamma)                   | Mm01168134_m1 |
| <i>Il6</i> (interleukin 6)                                         | Mm00446190_m1 |
| <i>Tnf<math>\alpha</math></i> (tumor necrosis factor)              | Mm00443258_m1 |
| <i>Il1<math>\beta</math></i> (interleukin 1 beta)                  | Mm00434228_m1 |
| <i>Pd-l1</i> (CD274 antigen)                                       | Mm03048248_m1 |
| <i>Il10</i> (interleukin 10)                                       | Mm01288386_m1 |
| <i>Tgf<math>\beta</math>1</i> (transforming growth factor, beta 1) | Mm01178820_m1 |
| <i>Hprt</i> (hypoxanthine guanine phosphoribosyl transferase)      | Mm03024075_m1 |



**Supplementary Table 5.** Antibodies and markers used for flow cytometry studies.

| Antibody/Marker                              | Fluorophore  | Clone       | Dilution | Company                      | Cat number        |
|----------------------------------------------|--------------|-------------|----------|------------------------------|-------------------|
| Live/dead                                    | GhostRed 780 |             | 1:200    | Tonbo Biosciences            | 13-0865-CD206T100 |
| F4/80                                        | PE-Dazzle594 | BM8         | 1:100    | Biolegend                    | 123146            |
| CD206                                        | BV421        | C068C2      | 1:100    | Biolegend                    | 141717            |
| CD11b                                        | BV711        | M1/70       | 1:100    | Biolegend                    | 101241            |
| CD80                                         | APC          | 16-10A1     | 1:100    | Biolegend                    | 104713            |
| CD163                                        | PE-Cy7       | S15049I     | 1:100    | Biolegend                    | 155319            |
| CD16/CD32                                    |              | S17011E     | 1:200    | Biolegend                    | 156604            |
| CD11c                                        | PerCP-Cy5.5  | N418        | 1:100    | Tonbo Biosciences            | 65-0114-U025      |
| CD80                                         | PE           | 16-10A1     | 1:100    | Tonbo Biosciences            | 50-0801-U025      |
| CD86                                         | BV605        | GL-1        | 1:100    | Biolegend                    | 105037            |
| CD317                                        | Alexa 700    | 927         | 1:100    | Biolegend                    | 127037            |
| CD4                                          | FITC         | RM4-5       | 1:100    | Biolegend                    | 100510            |
| IFN- $\gamma$                                | PE-Dazzle594 | XMG1.2      | 1:100    | Biolegend                    | 505845            |
| CD69                                         | PE-Cy5       | H1.2F3      | 1:100    | Biolegend                    | 104509            |
| CD45                                         | PE-Cy7       | 30-F11      | 1:100    | Biolegend                    | 103114            |
| CD3                                          | BV605        | 17A2        | 1:100    | Biolegend                    | 100237            |
| CD8a                                         | Alexa 700    | 53-6.7      | 1:100    | Biolegend                    | 100730            |
| FOXP3                                        | PE           | MF-14       | 1:50     | Biolegend                    | 126404            |
| PD-1                                         | BV421        | RMP1-30     | 1:100    | Biolegend                    | 109121            |
| CD62L                                        | BV510        | MEL-14      | 1:100    | Biolegend                    | 104441            |
| CD44                                         | BV711        | IM7         | 1:100    | Biolegend                    | 103057            |
| CD25                                         | APC          | 3C7         | 1:100    | Biolegend                    | 101910            |
| CD11c                                        | FITC         | N418        | 1:100    | Tonbo Biosciences            | 35-0114-U500      |
| MHCII (I-A/I-E)                              | PerCP-Cy5.5  | M5/114.15.2 | 1:100    | Biolegend                    | 107625            |
| CD103                                        | BV421        | 2E7         | 1:100    | Biolegend                    | 121422            |
| CD206                                        | BV605        | C068C2      | 1:100    | Biolegend                    | 141721            |
| MHCII (I-A/I-E)                              | BV510        | M5/114.15.2 | 1:100    | Biolegend                    | 107635            |
| Granzyme B                                   | PE           | QA16A02     | 1:100    | Biolegend                    | 372208            |
| CD3                                          | FITC         | 17A2        | 1:100    | Biolegend                    | 100203            |
| CD4                                          | BV510        | GK1.5       | 1:100    | Biolegend                    | 100449            |
| CD8a                                         | PerCP-Cy5.5  | 53-6.7      | 1:100    | Biolegend                    | 100734            |
| CD69                                         | BV421        | H1.2F3      | 1:100    | Biolegend                    | 104527            |
| Phospho-Histone H2A.X<br>(Ser139) Rabbit mAb |              |             | 1:400    | Cell Signaling<br>Technology | 9718S             |

**Supplementary Table 6.** p values for each comparison in Figure 5b and 5c, analyzed by linear mixed effects modeling and the log-rank test, respectively.

Tumor growth:

|         | RT    | PIC   | C4    | RT+C4  | PIC+RT | PIC+C4 | PIC+RT+C4 |
|---------|-------|-------|-------|--------|--------|--------|-----------|
| Control | 0.066 | 0.929 | 0.518 | <0.001 | 0.035  | 0.380  | <0.001    |

  

|           | Control | RT     | PIC    | C4     | RT+C4  | PIC+RT | PIC+C4 |
|-----------|---------|--------|--------|--------|--------|--------|--------|
| PIC+RT+C4 | <0.001  | <0.001 | <0.001 | <0.001 | <0.001 | <0.001 | <0.001 |

Mice survival:

|         | RT    | PIC   | C4    | RT+C4  | PIC+RT | PIC+C4 | PIC+RT+C4 |
|---------|-------|-------|-------|--------|--------|--------|-----------|
| Control | 0.005 | 0.755 | 0.804 | <0.001 | 0.011  | 0.272  | <0.001    |

  

|           | Control | RT     | PIC    | C4     | RT+C4 | PIC+RT | PIC+C4 |
|-----------|---------|--------|--------|--------|-------|--------|--------|
| PIC+RT+C4 | <0.001  | <0.001 | <0.001 | <0.001 | 0.001 | <0.001 | <0.001 |
